# Supplementary material
Source: publisher site journal article supplement (https://www.spandidos-publications.com/5660/downloadSupplementary)
Supplement: Supplementary file 1 [file downloadSupplementary]

Table SI. The Cancer Genome Atlas glioma patient characteristics.

| Characteristic                         | Low expression of S100A6 | High expression of S100A6 | P-value |
|----------------------------------------|--------------------------|---------------------------|---------|
| Number of patients                     | 348                      | 348                       | -       |
| World Health Organization grade, n (%) |                          |                           |         |
| G2                                     | 170 (26.8)               | 54 (8.5)                  | <0.001  |
| G3                                     | 132 (20.8)               | 111 (17.5)                |         |
| G4                                     | 10 (1.6)                 | 158 (24.9)                |         |
| Isocitrate dehydrogenase status, n (%) |                          |                           |         |
| Wild type                              | 35 (5.1)                 | 211 (30.8)                | <0.001  |
| Mutant                                 | 311 (45.3)               | 129 (18.8)                |         |
| 1p/19q codeletion, n (%)               |                          |                           |         |
| Codel                                  | 153 (22.2)               | 18 (2.6)                  | <0.001  |
| Non-codel                              | 195 (28.3)               | 323 (46.9)                |         |
| Primary therapy outcome, n (%)         |                          |                           |         |
| Progressive disease                    | 61 (13.2)                | 51 (11)                   | 0.110   |
| Stable disease                         | 100 (21.6)               | 47 (10.2)                 |         |
| Partial response                       | 43 (9.3)                 | 21 (4.5)                  |         |
| Complete response                      | 92 (19.9)                | 47 (10.2)                 |         |
| Sex, n (%)                             |                          |                           |         |
| Female                                 | 161 (23.1)               | 137 (19.7)                | 0.078   |
| Male                                   | 187 (26.9)               | 211 (30.3)                |         |
| Ethnicity, n (%)                       |                          |                           |         |
| Asian                                  | 7 (1)                    | 6 (0.9)                   | 0.959   |
| Black or African American              | 17 (2.5)                 | 16 (2.3)                  |         |
| White                                  | 320 (46.9)               | 317 (46.4)                |         |
| Years of age, n (%)                    |                          |                           |         |
| ≤60                                    | 315 (45.3)               | 238 (34.2)                | <0.001  |
| >60                                    | 33 (4.7)                 | 110 (15.8)                |         |

| Histological type, n (%)                   |            |            |        |
|--------------------------------------------|------------|------------|--------|
| Astrocytoma                                | 86 (12.4)  | 109 (15.7) | <0.001 |
| Glioblastoma                               | 10 (1.4)   | 158 (22.7) |        |
| Oligoastrocytoma                           | 87 (12.5)  | 47 (6.8)   |        |
| Oligodendroglioma                          | 165 (23.7) | 34 (4.9)   |        |
| Overall survival event, n (%)              |            |            |        |
| Alive                                      | 275 (39.5) | 149 (21.4) | <0.001 |
| Dead                                       | 73 (10.5)  | 199 (28.6) |        |
| Disease-specific survival event, n (%)     |            |            |        |
| Alive                                      | 277 (41)   | 154 (22.8) | <0.001 |
| Dead                                       | 65 (9.6)   | 179 (26.5) |        |
| Progression-free interval event, n (%)     |            |            |        |
| Alive                                      | 229 (32.9) | 121 (17.4) | <0.001 |
| Dead                                       | 119 (17.1) | 227 (32.6) |        |
| Median age (interquartile range),<br>years | 39 (31-49) | 54 (41-63) | <0.001 |

Table SII. S100A6 expression correlated with clinical pathological characteristics (logistic regression).

| Characteristics                 | Comparisons                                                                   | Total, n | Odds ratio               | P-value |
|---------------------------------|-------------------------------------------------------------------------------|----------|--------------------------|---------|
| World Health Organization grade | G3 + G4 vs. G2                                                                | 635      | 5.964<br>(4.154-8.671)   | <0.001  |
| 1p/19q codeletion               | Non-codel vs. codel                                                           | 689      | 14.079<br>(8.587-24.418) | <0.001  |
| Primary therapy outcome         | Partial response + complete response vs. progressive disease + stable disease | 462      | 0.828<br>(0.562-1.214)   | 0.335   |
| Isocitrate dehydrogenase status | Mutant vs. wild type                                                          | 686      | 0.069<br>(0.045-0.103)   | <0.001  |
| Sex                             | Male vs. female                                                               | 696      | 1.326<br>(0.982-1.793)   | 0.066   |
| Ethnicity                       | Black or African American and White vs. Asian                                 | 683      | 1.153<br>(0.379-3.615)   | 0.800   |
| Years of age                    | >60 vs. ≤60                                                                   | 696      | 4.412<br>(2.918-6.827)   | <0.001  |
| Histological type               | Oligoastrocytoma + oligodendroglioma vs. astrocytoma + glioblastoma           | 696      | 0.116<br>(0.082-0.162)   | <0.001  |

Table SIII. Univariate analysis and multivariate analyses of glioma patient overall survival.

| Characteristics                 | Total<br>(N) | Univariate analysis       |         | Multivariate analysis   |         |
|---------------------------------|--------------|---------------------------|---------|-------------------------|---------|
|                                 |              | HR (95% CI)               | P-value | HR (95% CI)             | P-value |
| World Health Organization grade | 634          | -                         | -       | -                       | -       |
| G2                              | 223          | Reference                 | -       | -                       | -       |
| G3                              | 243          | 2.999<br>(2.007-4.480)    | <0.001  | 1.802<br>(1.137-2.857)  | 0.012   |
| G4                              | 168          | 18.615<br>(12.460-27.812) | <0.001  | 4.759<br>(1.485-15.253) | 0.009   |
| 1p/19q codeletion               | 688          | -                         | -       | -                       | -       |
| Codel                           | 170          | Reference                 | -       | -                       | -       |
| Non-codel                       | 518          | 4.428<br>(2.885-6.799)    | <0.001  | 0.870<br>(0.445-1.700)  | 0.684   |
| Primary therapy outcome         | 461          | -                         | -       | -                       | -       |
| Progressive disease             | 112          | Reference                 | -       | -                       | -       |
| Stable disease                  | 147          | 0.440<br>(0.294-0.658)    | <0.001  | 0.345<br>(0.207-0.575)  | <0.001  |
| Partial response                | 64           | 0.170<br>(0.074-0.391)    | <0.001  | 0.175<br>(0.062-0.493)  | <0.001  |
| Complete response               | 138          | 0.133<br>(0.064-0.278)    | <0.001  | 0.155<br>(0.072-0.334)  | <0.001  |
| Isocitrate dehydrogenase status | 685          | -                         | -       | -                       | -       |
| Wild-type                       | 246          | Reference                 | -       | -                       | -       |

|                   |     |                        |        |                        |        |
|-------------------|-----|------------------------|--------|------------------------|--------|
| Mutant            | 439 | 0.117<br>(0.090-0.152) | <0.001 | 0.374<br>(0.218-0.642) | <0.001 |
| Sex               | 695 | -                      | -      | -                      | -      |
| Female            | 297 | Reference              |        |                        |        |
| Male              | 398 | 1.262<br>(0.988-1.610) | 0.062  | 1.551<br>(0.980-2.454) | 0.061  |
| Years of age      | 695 | -                      | -      | -                      | -      |
| ≤60               | 552 | Reference              | -      | -                      | -      |
| >60               | 143 | 4.668<br>(3.598-6.056) | <0.001 | 3.387<br>(2.021-5.676) | <0.001 |
| Histological type | 695 | -                      | -      | -                      | -      |
| Astrocytoma       | 195 | Reference              | -      | -                      | -      |
| Glioblastoma      | 168 | 6.791<br>(4.932-9.352) | <0.001 |                        |        |
| Oligoastrocytoma  | 134 | 0.657<br>(0.419-1.031) | 0.068  | 1.369<br>(0.787-2.380) | 0.266  |
| Oligodendroglioma | 198 | 0.580<br>(0.395-0.853) | 0.006  | 0.768<br>(0.437-1.350) | 0.359  |
| S100A6 expression | 695 | -                      | -      | -                      | -      |
| Low               | 347 | Reference              | -      | -                      | -      |
| High              | 348 | 4.914<br>(3.716-6.496) | <0.001 | 2.155<br>(1.358-3.419) | 0.001  |

HR, hazard ratio.

Table SIV. Gene set enrichment analysis of S100A6 related enriched gene set with high expression of S100A6 from The Cancer Genome Atlas database.

| ID                                              | NES   | P.adjust | False discovery rate |
|-------------------------------------------------|-------|----------|----------------------|
| c2 enrichment analysis                          |       |          |                      |
| Reactome scavenging of heme from plasma         | 2.685 | 0.002    | 0.001                |
| Reactome creation of c4 and c2 activators       | 2.640 | 0.002    | 0.001                |
| Reactome fcgr activation                        | 2.632 | 0.002    | 0.001                |
| Reactome initial triggering of complement       | 2.630 | 0.002    | 0.001                |
| Reactome role of phospholipids in phagocytosis  | 2.616 | 0.002    | 0.001                |
| c5 enrichment analysis                          |       |          |                      |
| Go immunoglobulin complex                       | 2.747 | 0.002    | 0.002                |
| Go immunoglobulin complex circulating           | 2.690 | 0.002    | 0.002                |
| Go humoral immune response mediated by circulat | 2.658 | 0.002    | 0.002                |
| Go immunoglobulin receptor binding              | 2.626 | 0.002    | 0.002                |
| Go complement activation                        | 2.570 | 0.002    | 0.002                |
